# Supplementary material
Source: publisher site journal article supplement (https://static.cambridge.org/content/id/urn:cambridge.org:id:article:S0007114521002336/resource/name/S0007114521002336supp001.pdf)
Supplement: Supplementary file 1 [file S0007114521002336supp001.pdf]

## Supplementary Information

**Metabolic and molecular signatures of improved growth in Atlantic salmon (*Salmo salar*) fed surplus levels of methionine, folic acid, vitamin B6 and B12 throughout smoltification.**

Anne-Catrin Adam\*<sup>1</sup>, Takaya Saito<sup>1</sup>, Marit Espe<sup>1</sup>, Paul Whatmore<sup>1a</sup>, Jorge M.O. Fernandes<sup>2</sup>, Vibeke Vikeså<sup>3</sup>, Kaja H. Skjaerven<sup>1</sup>

\* Corresponding author: Anne-Catrin Adam, e-mail: Anne-Catrin.Adam@hi.no, mobile: +4748341656

<sup>1</sup> Institute of Marine Research, P. O. Box 1870 Nordnes, 5817 Bergen, Norway

<sup>2</sup> Nord University, Faculty of Biosciences and Aquaculture, P. O. Box 1490, 8049 Bodø, Norway

<sup>3</sup> Skretting ARC, Stavanger, Norway, P.O. Box 48, 4001 Stavanger, Norway.

<sup>a</sup> Current affiliation: eResearch Office, Queensland University of Technology, GPO Box 2434, Brisbane, QLD 4001

## Supplementary Methods

### RNA library preparation and high-throughput sequencing

Total RNA quality was assessed using Agilent's High Sensitivity RNA ScreenTape Analysis (Agilent Technologies, USA) before creating mRNA fragments for high-throughput sequencing. Libraries of 18 samples were simultaneously generated, and samples were balanced for gender, treatment group and stage. Libraries of approximately 200 nt insert size were generated following the protocol NEBNext<sup>®</sup> Ploy(A) mRNA Magnetic Isolation Module (NEB #E7490 New England BioLabs Inc., USA) using NEBNext<sup>®</sup> Ultra II Directional RNA Library Prep Kit for Illumina<sup>®</sup> (NEB #E7760L, New England BioLabs Inc., USA). Libraries were barcoded with unique index primers using NEBNext<sup>®</sup> Multiplex Oligos for Illumina<sup>®</sup> (NEB #E6609, New England BioLabs Inc., USA) and PCR enriched. Library quality was assessed using High Sensitivity D1000 ScreenTapes (Agilent Technologies, USA). Barcoded libraries were normalized with KAPA library quantification kit (Kapa Biosystems, USA), pooled, and denatured according to the NextSeq System Denature and Dilute Libraries Guide (Illumina, USA). Pooled Libraries were spiked with a PhiX Control for HiSeq<sup>®</sup> and loaded on a NextSeq500 reagent cartridge (Illumina, USA) using NextSeq 500/550 High Output Kit v2 (Illumina, USA) to generate 76 bp single-end reads.

### Analysis and bioinformatics environment

Quality control, mapping and quantification of the data has been completed on a Linux server via command-line operations. The program Fastqc v0.11.8 (Babraham Bioinformatics) was used for quality assessment. The program multiqc was used to collate QC reports for all samples. The subsequent analysis (outliers, differential expression, functional annotation) is done mostly in R using a variety of R packages. Bioconductor packages used in the downstream analysis are: DESeq2, foreign, AnnotationHub, clusterProfiler, geneplotter, pathview, Rgraphviz, GenomicFeatures, BiocParallel and other packages used include: tidyverse, httr, tidyr, pander, readxl, devtools, vegan, pheatmap, DT, RColorBrewer, rlang, openxlsx, igraph, ggraph, plotly, graphlayouts, ggpubr.

## Supplementary Tables

**Table S1. Experimental feed composition.**Re-used and modified table from Espe et al.<sup>1</sup>.

| Feed composition (g/kg) | Base†             | 3 mm    |       | 4 mm    |       |
|-------------------------|-------------------|---------|-------|---------|-------|
|                         |                   | Control | 1C+   | Control | 1C+   |
| Wheat                   |                   | 54.22   | 50.64 | 54.22   | 50.64 |
| Wheat gluten            | 132.03            | -       | -     | -       | -     |
| Sunflower meal          | 10.0              | -       | -     | -       | -     |
| Dehulled faba beans     | 30.0              | -       | -     | -       | -     |
| Pea concentrate         | 150.0             | -       | -     | -       | -     |
| Soy protein concentrate | 240.0             | -       | -     | -       | -     |
| Krill meal              | 20.0              | -       | -     | -       | -     |
| Fish meal               | 120.0             | -       | -     | -       | -     |
| Rapeseed oil            | 81.24             | -       | -     | -       | -     |
| Fish oil                | 126.9             | -       | -     | -       | -     |
| Water                   |                   | 11.43   | 11.84 | 11.43   | 11.84 |
| DL-methionine           |                   | 0.05    | 3.12  | 0.05    | 3.12  |
| choline                 | 0.92              | -       | -     | -       | -     |
| NRC mineral mix         | 2.0               | -       | -     | -       | -     |
| NRC Vitamin mix         | 1.0               | -       | -     | -       | -     |
| Vitamin B12             |                   | 0.16    | 0.18  | 0.16    | 0.18  |
| Folate                  |                   | 0.02    | 0.05  | 0.02    | 0.05  |
| Vitamin B6              |                   | 0.08    | 0.11  | 0.08    | 0.11  |
| Taurine                 | 2.8               | -       | -     | -       | -     |
| Micronutrients          | 17.2 <sup>a</sup> | -       | -     | -       | -     |

†base value indicates that all values in the same row are equivalent/similar across the feeds and the pellet sizes.

<sup>a</sup>value is not equivalent but similar as determined by their relatively small SD:  $\pm 0.01$ , respectively.

<sup>1</sup> Espe M, Vikesa V, Thomsen TH et al. (2020) Atlantic salmon fed a nutrient package of surplus methionine, vitamin B12, folic acid and vitamin B6 improved growth and reduced the relative liver size, but when in excess growth reduced. *Aquacult Nutr* 26, 477-489.

Supplementary\_information

**Table S2. Sample information for RNA-sequencing analysis.**

mRNA has been extracted from muscle tissue originated from individual fish. M: male, F: female, NA: not available, CF: condition factor, HSI: hepatosomatic index, RIN: RNA integrity number.

| Sample ID | Analysis ID | Feed    | Stage      | Gender | Tank ID | Body weight (RW, g) | Body length (cm) | CF   | Liver weight (g) | HSI   | Flow cell | RIN |
|-----------|-------------|---------|------------|--------|---------|---------------------|------------------|------|------------------|-------|-----------|-----|
| 6         | pre_L1C_5   | Control | pre_smolt  | M      | t639    | 101                 | 19.8             | 1.3  | 0.94             | 0.93  | F1        | 9.4 |
| 7         | pre_L1C_1   | Control | pre_smolt  | F      | t639    | 92                  | 19.8             | 1.19 | 0.82             | 0.89  | F2        | 9.1 |
| 9         | pre_L1C_2   | Control | pre_smolt  | M      | t639    | 107                 | 19.6             | 1.42 | 1.2              | 1.12  | F2        | 9.3 |
| 22        | pre_M1C_6   | 1C+     | pre_smolt  | M      | t645    | 95                  | 19.5             | 1.28 | 0.89             | 0.94  | F1        | 9.3 |
| 23        | pre_M1C_7   | 1C+     | pre_smolt  | F      | t645    | 102                 | 20.4             | 1.2  | 0.93             | 0.91  | F1        | 9.1 |
| 24        | pre_M1C_1   | 1C+     | pre_smolt  | M      | t645    | 84                  | 18.6             | 1.31 | 0.9              | 1.07  | F2        | 9.4 |
| 26        | pre_L1C_6   | Control | pre_smolt  | F      | t648    | 103                 | 20.5             | 1.2  | 1.42             | 1.38  | F1        | 9.4 |
| 29        | pre_L1C_7   | Control | pre_smolt  | M      | t648    | 95                  | 20.5             | 1.1  | 0.96             | 1.01  | F1        | 9.4 |
| 30        | pre_L1C_3   | Control | pre_smolt  | M      | t648    | 72                  | 27.8             | 0.34 | 9.83             | 13.65 | F2        | 9.4 |
| 32        | pre_M1C_2   | 1C+     | pre_smolt  | M      | t649    | NA                  | NA               | NA   | NA               | NA    | F2        | 9.4 |
| 33        | pre_M1C_8   | 1C+     | pre_smolt  | M      | t649    | NA                  | NA               | NA   | NA               | NA    | F1        | 9.3 |
| 34        | pre_M1C_3   | 1C+     | pre_smolt  | M      | t649    | NA                  | NA               | NA   | NA               | NA    | F2        | 9.3 |
| 37        | pre_M1C_9   | 1C+     | pre_smolt  | F      | t650    | 88                  | 19               | 1.28 | 0.77             | 0.88  | F1        | 9.4 |
| 39        | pre_M1C_4   | 1C+     | pre_smolt  | F      | t650    | 131                 | 21.5             | 1.32 | 1.14             | 0.87  | F2        | 9.3 |
| 40        | pre_M1C_5   | 1C+     | pre_smolt  | F      | t650    | 121                 | 21               | 1.31 | 1.26             | 1.04  | F2        | 9.3 |
| 41        | pre_L1C_8   | Control | pre_smolt  | F      | t651    | 88                  | 18.5             | 1.39 | 0.95             | 1.08  | F1        | 9.4 |
| 42        | pre_L1C_4   | Control | pre_smolt  | F      | t651    | 90                  | 19.2             | 1.27 | 0.9              | 1     | F2        | 9.3 |
| 44        | pre_L1C_9   | Control | pre_smolt  | M      | t651    | 102                 | 20.2             | 1.24 | 1.14             | 1.12  | F1        | 9.4 |
| 96        | post_L1C_6  | Control | post_smolt | F      | t188    | 600                 | 35               | 1.4  | 8.57             | 1.43  | F1        | 9.1 |
| 98        | post_L1C_1  | Control | post_smolt | F      | t188    | 489                 | 33               | 1.36 | 7.25             | 1.48  | F2        | 9.5 |
| 100       | post_L1C_2  | Control | post_smolt | M      | t188    | 566                 | 33.5             | 1.51 | 9                | 1.59  | F2        | 9.1 |
| 111       | post_M1C_5  | 1C+     | post_smolt | M      | t194    | 629                 | 33.5             | 1.67 | 8.56             | 1.36  | F1        | 9.5 |

### Supplementary\_information

|            |            |         |            |   |      |     |      |      |       |      |    |     |
|------------|------------|---------|------------|---|------|-----|------|------|-------|------|----|-----|
| <b>114</b> | post_M1C_6 | 1C+     | post_smolt | M | t194 | 519 | 33   | 1.44 | 6.72  | 1.29 | F1 | 9.5 |
| <b>115</b> | post_M1C_1 | 1C+     | post_smolt | M | t194 | 520 | 33   | 1.45 | 6.75  | 1.3  | F2 | 9.5 |
| <b>118</b> | post_L1C_7 | Control | post_smolt | F | t197 | 540 | 33   | 1.5  | 7.63  | 1.41 | F1 | 9.6 |
| <b>119</b> | post_L1C_8 | Control | post_smolt | M | t197 | 419 | 31   | 1.41 | 6.53  | 1.56 | F1 | 9.6 |
| <b>120</b> | post_L1C_3 | Control | post_smolt | M | t197 | 449 | 32   | 1.37 | 6.63  | 1.48 | F2 | 9.5 |
| <b>121</b> | post_M1C_7 | 1C+     | post_smolt | F | t198 | 583 | 34   | 1.48 | 5.99  | 1.03 | F1 | 9.6 |
| <b>124</b> | post_M1C_2 | 1C+     | post_smolt | F | t198 | 531 | 32   | 1.62 | 5.93  | 1.12 | F2 | 9.7 |
| <b>125</b> | post_M1C_8 | 1C+     | post_smolt | M | t198 | 798 | 36   | 1.71 | 12.04 | 1.51 | F1 | 9.6 |
| <b>126</b> | post_M1C_3 | 1C+     | post_smolt | F | t199 | 577 | 33   | 1.61 | 6.52  | 1.13 | F2 | 8.9 |
| <b>127</b> | post_M1C_4 | 1C+     | post_smolt | F | t199 | 513 | 32   | 1.57 | 6.24  | 1.22 | F2 | 9.1 |
| <b>128</b> | post_M1C_9 | 1C+     | post_smolt | F | t199 | 509 | 32.5 | 1.48 | 5.79  | 1.14 | F1 | 9.1 |
| <b>131</b> | post_L1C_4 | Control | post_smolt | F | t200 | 423 | 31   | 1.42 | 5.74  | 1.36 | F2 | 9.2 |
| <b>133</b> | post_L1C_9 | Control | post_smolt | M | t200 | 572 | 34   | 1.46 | 9.59  | 1.68 | F1 | 9.3 |
| <b>135</b> | post_L1C_5 | Control | post_smolt | F | t200 | 488 | 33   | 1.36 | 9.32  | 1.91 | F2 | 8.2 |

**Table S3. Sample information for global metabolic profiling and SAM/SAH analysis.**

Muscle from 5 individual fish from the same tank were pooled for analysis.

| Sample ID | Sample type | Feeds   | Stage      | tank ID |
|-----------|-------------|---------|------------|---------|
| 1794/2    | Pooled      | Control | pre-smolt  | t639    |
| 1794/5    | Pooled      | 1C+     | pre-smolt  | t645    |
| 1794/6    | Pooled      | Control | pre-smolt  | t648    |
| 1794/7    | Pooled      | 1C+     | pre-smolt  | t649    |
| 1794/8    | Pooled      | 1C+     | pre-smolt  | t650    |
| 1794/9    | Pooled      | Control | pre-smolt  | t651    |
| 1794/20   | Pooled      | Control | post-smolt | t188    |
| 1794/23   | Pooled      | 1C+     | post-smolt | t194    |
| 1794/24   | Pooled      | Control | post-smolt | t197    |
| 1794/25   | Pooled      | 1C+     | post-smolt | t198    |
| 1794/26   | Pooled      | 1C+     | post-smolt | t199    |
| 1794/27   | Pooled      | Control | post-smolt | t200    |

**Table S4. Global metabolic profiling results and metabolite class enrichment of pre- and post-smolt Atlantic salmon muscle.**

|                |                                                                                                                                |  |                                     |  |
|----------------|--------------------------------------------------------------------------------------------------------------------------------|--|-------------------------------------|--|
| <b>File:</b>   | <a href="https://doi.org/10.6084/m9.figshare.14484489">Provided separately on figshare (DOI: 10.6084/m9.figshare.14484489)</a> |  |                                     |  |
| <b>Sheets:</b> | (1) Metabolite data                                                                                                            |  |                                     |  |
|                | (2) Descriptive Statistics                                                                                                     |  |                                     |  |
|                | (3) Inferential Statistics                                                                                                     |  |                                     |  |
|                | (4) Enrichment pre-smolt                                                                                                       |  | Metabolite class enrichment results |  |
|                | (5) Enrichment post-smolt                                                                                                      |  | Metabolite class enrichment results |  |

Supplementary\_information

**Table S5. Changes in amino acid profiles discriminate both pre- and post-smolt muscle of salmon fed varying 1C nutrients.** Metabolite class enrichment analysis unravels the largest differences in the metabolic profiles between muscle from the 1C+ and Control group. Calculated enrichment scores underlie the ratio of significant altered metabolites (FDR<0.1) among detected ones in a metabolite class in relation to all significant altered metabolites among all detected ones in the global metabolic profiling. Significance of enrichment was assessed using Fisher`s exact test with Benjamini and Hochberg correction (Benjamini et al., 1995)<sup>1</sup>. Bold numbers designate significant class enrichment (adjusted p-value <0.05).

| Metabolites                             |            | Pre-smolt muscle<br>1C+ vs. Control |                  |                  | Post-smolt muscle<br>1C+ vs. Control |                  |                  |
|-----------------------------------------|------------|-------------------------------------|------------------|------------------|--------------------------------------|------------------|------------------|
| Metabolite class                        | Detected   | Significant altered                 | Enrichment score | Adjusted P-value | Significant altered                  | Enrichment score | Adjusted P-value |
| Amino acids                             | 19         | 6                                   | 13               | <b>8.15E-04</b>  | 15                                   | 11.4             | <b>8.69E-08</b>  |
| Amino acids related                     | 20         | 3                                   | 6.2              | 0.14             | 6                                    | 4.3              | <b>0.04</b>      |
| Bile acids                              | 1          | 0                                   | 0                | 1                | 0                                    | 0                | 1                |
| Carbohydrates and related               | 7          | 0                                   | 0                | 1                | 1                                    | 2.1              | 0.92             |
| Complex lipids, fatty acids and related | 201        | 0                                   | 0                | 1                | 5                                    | 0.4              | 1                |
| Energy metabolism and related           | 15         | 0                                   | 0                | 1                | 0                                    | 0                | 1                |
| Hormones, signal substances and related | 1          | 0                                   | 0                | 1                | 0                                    | 0                | 1                |
| Microbiome or alimentary                | 2          | 1                                   | 20.6             | 0.28             | 1                                    | 7.2              | 0.76             |
| Miscellaneous                           | 8          | 1                                   | 5.1              | 0.63             | 1                                    | 1.8              | 0.92             |
| Nucleobases and related                 | 12         | 0                                   | 0                | 1                | 0                                    | 0                | 1                |
| Unknown                                 | 237        | 2                                   | 0.3              | 1                | 6                                    | 0.4              | 1                |
| Vitamins, cofactors and related         | 13         | 0                                   | 0                | 1                | 2                                    | 2.2              | 0.78             |
| <b>Total metabolite count</b>           | <b>536</b> | <b>13</b>                           |                  |                  | <b>37</b>                            |                  |                  |

<sup>1</sup> Benjamini Y, Hochberg Y (1995) Controlling the False Discovery Rate - a Practical and Powerful Approach to Multiple Testing. J R Stat Soc B 57, 289-300.

Supplementary\_information

**Table S6. RNA-sequencing mapping and quantification results.**

Mapping results show the number and percentage of mapped reads to the entire reference genome, which includes introns, exons, intergenic regions, etc. Quantification results show how many of the successfully mapped reads fell within specific defined genomic regions - in this case genes.

| Sample ID | Mapping results |            |            |           |           |              | Quantification results |          |            |            |
|-----------|-----------------|------------|------------|-----------|-----------|--------------|------------------------|----------|------------|------------|
|           | Total reads     | Single-map | Single-map | Multi-map | Multi-map | Total mapped | Assigned               | Assigned | Unassigned | Unassigned |
| 6         | 26 263 108      | 19 896 923 | 75.76 %    | 5 120 179 | 19.50 %   | 95.26 %      | 18 417 759             | 52.33 %  | 16 775 464 | 47.67 %    |
| 7         | 25 792 668      | 19 641 695 | 76.15 %    | 4 803 370 | 18.62 %   | 94.78 %      | 18 065 451             | 53.06 %  | 15 984 280 | 46.94 %    |
| 9         | 28 700 940      | 21 106 006 | 73.54 %    | 5 825 777 | 20.30 %   | 93.84 %      | 19 469 438             | 49.08 %  | 20 196 187 | 50.92 %    |
| 22        | 30 365 962      | 22 644 551 | 74.57 %    | 6 174 816 | 20.33 %   | 94.91 %      | 20 983 375             | 50.64 %  | 20 454 683 | 49.36 %    |
| 23        | 24 699 137      | 18 797 514 | 76.11 %    | 4 769 035 | 19.31 %   | 95.41 %      | 17 384 275             | 52.79 %  | 15 546 936 | 47.21 %    |
| 24        | 25 912 634      | 19 122 115 | 73.79 %    | 5 212 998 | 20.12 %   | 93.91 %      | 17 621 542             | 49.50 %  | 17 980 548 | 50.50 %    |
| 26        | 24 544 022      | 18 370 975 | 74.85 %    | 4 924 131 | 20.06 %   | 94.91 %      | 17 013 184             | 50.88 %  | 16 422 201 | 49.12 %    |
| 29        | 24 945 291      | 18 962 770 | 76.02 %    | 4 704 966 | 18.86 %   | 94.88 %      | 17 485 934             | 52.61 %  | 15 752 420 | 47.39 %    |
| 30        | 24 162 448      | 17 719 733 | 73.34 %    | 4 968 131 | 20.56 %   | 93.90 %      | 16 334 207             | 48.71 %  | 17 200 626 | 51.29 %    |
| 32        | 27 576 337      | 20 164 847 | 73.12 %    | 5 861 646 | 21.26 %   | 94.38 %      | 18 629 225             | 48.47 %  | 19 804 904 | 51.53 %    |
| 33        | 18 066 269      | 13 638 173 | 75.49 %    | 3 533 957 | 19.56 %   | 95.05 %      | 12 598 009             | 52.01 %  | 11 624 842 | 47.99 %    |
| 34        | 27 679 733      | 20 725 902 | 74.88 %    | 5 322 755 | 19.23 %   | 94.11 %      | 19 075 825             | 51.30 %  | 18 105 953 | 48.70 %    |
| 37        | 23 967 199      | 17 761 661 | 74.11 %    | 4 854 736 | 20.26 %   | 94.36 %      | 16 412 229             | 49.71 %  | 16 605 316 | 50.29 %    |
| 39        | 23 785 602      | 18 066 460 | 75.96 %    | 4 368 004 | 18.36 %   | 94.32 %      | 16 568 215             | 52.24 %  | 15 150 122 | 47.76 %    |
| 40        | 23 548 514      | 17 481 600 | 74.24 %    | 4 729 620 | 20.08 %   | 94.32 %      | 16 148 535             | 50.01 %  | 16 138 908 | 49.99 %    |
| 41        | 21 434 623      | 15 678 626 | 73.15 %    | 4 542 494 | 21.19 %   | 94.34 %      | 14 505 674             | 48.18 %  | 15 604 579 | 51.82 %    |
| 42        | 24 671 395      | 18 399 608 | 74.58 %    | 4 728 921 | 19.17 %   | 93.75 %      | 16 861 960             | 50.48 %  | 16 541 294 | 49.52 %    |
| 44        | 28 131 901      | 21 080 812 | 74.94 %    | 5 503 142 | 19.56 %   | 94.50 %      | 19 499 339             | 51.46 %  | 18 394 519 | 48.54 %    |
| 96        | 26 437 314      | 19 478 138 | 73.68 %    | 5 688 792 | 21.52 %   | 95.19 %      | 18 100 278             | 49.31 %  | 18 603 772 | 50.69 %    |
| 98        | 24 432 351      | 17 734 305 | 72.59 %    | 5 222 590 | 21.38 %   | 93.96 %      | 16 378 692             | 47.94 %  | 17 784 858 | 52.06 %    |
| 100       | 24 824 397      | 18 029 450 | 72.63 %    | 5 171 964 | 20.83 %   | 93.46 %      | 16 598 208             | 48.15 %  | 17 875 876 | 51.85 %    |



Supplementary\_information

|                |                   |                   |                |                  |                |                |                   |                |                   |                |
|----------------|-------------------|-------------------|----------------|------------------|----------------|----------------|-------------------|----------------|-------------------|----------------|
| 111            | 24 511 184        | 17 577 407        | 71.71 %        | 5 571 387        | 22.73 %        | 94.44 %        | 16 299 497        | 46.42 %        | 18 813 766        | 53.58 %        |
| 114            | 23 467 916        | 16 836 145        | 71.74 %        | 5 356 899        | 22.83 %        | 94.57 %        | 15 670 900        | 46.59 %        | 17 961 461        | 53.41 %        |
| 115            | 26 149 022        | 18 854 954        | 72.11 %        | 5 614 538        | 21.47 %        | 93.58 %        | 17 455 019        | 47.76 %        | 19 094 779        | 52.24 %        |
| 118            | 22 205 858        | 16 185 973        | 72.89 %        | 4 807 097        | 21.65 %        | 94.54 %        | 14 993 430        | 47.87 %        | 16 324 737        | 52.13 %        |
| 119            | 18 399 258        | 13 229 357        | 71.90 %        | 3 784 664        | 20.57 %        | 92.47 %        | 12 241 411        | 48.02 %        | 13 252 539        | 51.98 %        |
| 120            | 24 070 388        | 17 582 963        | 73.05 %        | 5 005 815        | 20.80 %        | 93.84 %        | 16 217 338        | 48.68 %        | 17 099 641        | 51.32 %        |
| 121            | 22 899 769        | 16 468 106        | 71.91 %        | 5 158 694        | 22.53 %        | 94.44 %        | 15 324 914        | 46.99 %        | 17 290 743        | 53.01 %        |
| 124            | 26 545 681        | 19 227 580        | 72.43 %        | 5 739 809        | 21.62 %        | 94.05 %        | 17 765 389        | 47.68 %        | 19 490 641        | 52.32 %        |
| 125            | 20 725 864        | 14 967 153        | 72.21 %        | 4 632 887        | 22.35 %        | 94.57 %        | 13 906 553        | 47.19 %        | 15 565 209        | 52.81 %        |
| 126            | 24 573 059        | 17 743 464        | 72.21 %        | 5 325 447        | 21.67 %        | 93.88 %        | 16 414 217        | 47.32 %        | 18 275 296        | 52.68 %        |
| 127            | 24 984 516        | 17 236 554        | 68.99 %        | 5 621 512        | 22.50 %        | 91.49 %        | 15 923 779        | 44.24 %        | 20 072 406        | 55.76 %        |
| 128            | 23 436 329        | 16 640 658        | 71.00 %        | 5 421 220        | 23.13 %        | 94.14 %        | 15 462 510        | 45.32 %        | 18 655 152        | 54.68 %        |
| 131            | 24 699 937        | 17 973 390        | 72.77 %        | 5 281 251        | 21.38 %        | 94.15 %        | 16 644 397        | 48.44 %        | 17 713 050        | 51.56 %        |
| 133            | 22 643 606        | 16 460 449        | 72.69 %        | 4 989 886        | 22.04 %        | 94.73 %        | 15 294 704        | 47.65 %        | 16 803 836        | 52.35 %        |
| 135            | 27 630 278        | 20 037 723        | 72.52 %        | 6 032 907        | 21.83 %        | 94.36 %        | 18 599 714        | 47.92 %        | 20 214 884        | 52.08 %        |
| <b>AVERAGE</b> | <b>24 635 681</b> | <b>18 097 882</b> | <b>73.43 %</b> | <b>5 121 557</b> | <b>20.81 %</b> | <b>94.24 %</b> | <b>16 732 365</b> | <b>49.08 %</b> | <b>17 366 012</b> | <b>50.92 %</b> |

**Table S7. Lists of differentially expressed genes (DEG) in pre-smolt and post-smolt muscle and overlapping annotations.**

|                |                                                                                                                                |                                                                                                                                                         |
|----------------|--------------------------------------------------------------------------------------------------------------------------------|---------------------------------------------------------------------------------------------------------------------------------------------------------|
| <b>File:</b>   | <a href="https://doi.org/10.6084/m9.figshare.14484489">Provided separately on figshare (DOI: 10.6084/m9.figshare.14484489)</a> |                                                                                                                                                         |
| <b>Sheets:</b> | (1) Pre-smolt<br>(2) Post-smolt<br>(3) Overlap                                                                                 |                                                                                                                                                         |
| <b>Fields:</b> | Entrez ID                                                                                                                      | Entrez Gene ID                                                                                                                                          |
|                | Log2FC                                                                                                                         | Log2 fold change, output of DESeq2;<br>Genes with negative log2FC are lower expressed in 1C+ than in Control muscle, and vice versa for positive log2FC |
|                | Pvalue                                                                                                                         | Output of DESeq2                                                                                                                                        |
|                | Adjustedp                                                                                                                      | Adjusted p value, output DESeq2                                                                                                                         |
|                | Gene_symbol                                                                                                                    | Gene symbol                                                                                                                                             |
|                | Description                                                                                                                    | Gene name                                                                                                                                               |
|                | Stage                                                                                                                          | Pre-smolt or post-smolt data set                                                                                                                        |

Table S8. Functional annotation of differentially expressed genes in pre-smolt muscle.

|                |                                                                                                                                 |                                                      |
|----------------|---------------------------------------------------------------------------------------------------------------------------------|------------------------------------------------------|
| <b>File:</b>   | Provided separately on figshare (DOI: <a href="https://doi.org/10.6084/m9.figshare.14484489">10.6084/m9.figshare.14484489</a> ) |                                                      |
| <b>Sheets:</b> | (1) KEGG                                                                                                                        | KEGG pathways                                        |
|                | (1) KEGG genes                                                                                                                  | List of DEGs with KEGG pathway IDs                   |
|                | (2) CC terms                                                                                                                    | Gene Ontology term: cellular component               |
|                | (2) CC genes                                                                                                                    | List of DEGs with GO term (CC) IDs                   |
|                | (3) BP terms                                                                                                                    | Gene Ontology term: biological process               |
|                | (3) BP genes                                                                                                                    | List of DEGs with GO term (BP) IDs                   |
|                | (4) MF terms                                                                                                                    | Gene Ontology term: molecular function               |
|                | (4) MF genes                                                                                                                    | List of DEGs with GO term (MF) IDs                   |
| <b>Fields:</b> | Entrez ID                                                                                                                       | Entrez Gene ID                                       |
|                | Log2FC                                                                                                                          | Log2 fold change, output of DESeq2                   |
|                | Gene_symbol                                                                                                                     | Gene symbol                                          |
|                | Gene_description                                                                                                                | Gene name                                            |
|                | Pathway_ID                                                                                                                      | KEGG pathway ID                                      |
|                | Pathway_description                                                                                                             | Description of the KEGG pathway                      |
|                | GO_Term_ID                                                                                                                      | Gene Ontology term ID                                |
|                | GO_Term_description                                                                                                             | Description of the Gene Ontology term                |
|                | Adjusted_P                                                                                                                      | Adjusted p value by hypergeometric distribution test |
|                | Gene_count                                                                                                                      | Gene count in a pathway or GO term                   |

Table S9. Functional annotation of differentially expressed genes in post-smolt muscle.

|                |                                                                                                                                |                                                      |
|----------------|--------------------------------------------------------------------------------------------------------------------------------|------------------------------------------------------|
| <b>File:</b>   | <a href="https://doi.org/10.6084/m9.figshare.14484489">Provided separately on figshare (DOI: 10.6084/m9.figshare.14484489)</a> |                                                      |
| <b>Sheets:</b> | (1) KEGG                                                                                                                       | KEGG pathways                                        |
|                | (1) KEGG genes                                                                                                                 | List of DEGs with KEGG pathway IDs                   |
|                | (2) GO_CC                                                                                                                      | Gene Ontology term: cellular component               |
|                | (2) GO_CC genes                                                                                                                | List of DEGs with GO term (CC) IDs                   |
|                | (3) GO_MF                                                                                                                      | Gene Ontology term: molecular function               |
|                | (3) GO_MF genes                                                                                                                | List of DEGs with GO term (MF) IDs                   |
|                | (4) GO_BP                                                                                                                      | Gene Ontology term: biological process               |
|                | (4) GO_BP genes                                                                                                                | List of DEGs with GO term (BP) IDs                   |
| <b>Fields:</b> | Entrez ID                                                                                                                      | Entrez Gene ID                                       |
|                | Log2FC                                                                                                                         | Log2 fold change, output of DESeq2                   |
|                | Gene_symbol                                                                                                                    | Gene symbol                                          |
|                | Gene_description                                                                                                               | Gene name                                            |
|                | Pathway_ID                                                                                                                     | KEGG pathway ID                                      |
|                | Pathway_description                                                                                                            | Description of the KEGG pathway                      |
|                | GO_Term_ID                                                                                                                     | Gene Ontology term ID                                |
|                | GO_Term_description                                                                                                            | Description of the Gene Ontology term                |
|                | Adjusted_P                                                                                                                     | Adjusted p value by hypergeometric distribution test |
|                | Gene_count                                                                                                                     | Gene count in a pathway or GO term                   |

## Supplementary Figures

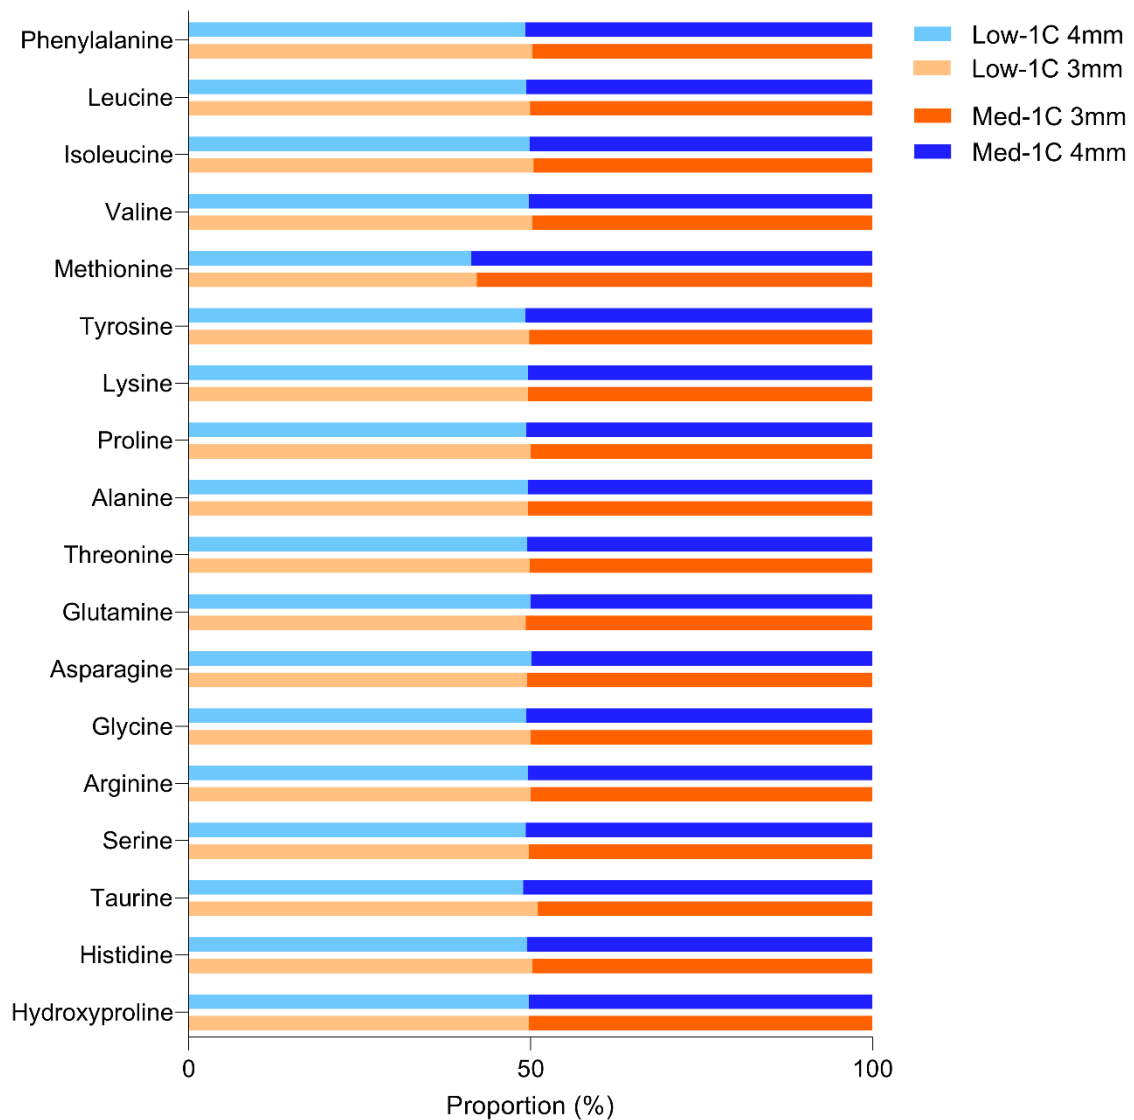

**Figure S1. Amino acid composition in the Control and 1C+ feeds (pellet size 3 mm and 4 mm) illustrated as proportions.**

Methionine is the amino acid different between the feeds, whereas other amino acids were the same. Modified graph from Espe et al. <sup>1</sup>.

<sup>1</sup> Espe M, Vikesa V, Thomsen TH et al. (2020) Atlantic salmon fed a nutrient package of surplus methionine, vitamin B12, folic acid and vitamin B6 improved growth and reduced the relative liver size, but when in excess growth reduced. *Aquacult Nutr* 26, 477-489.

## Supplementary\_information

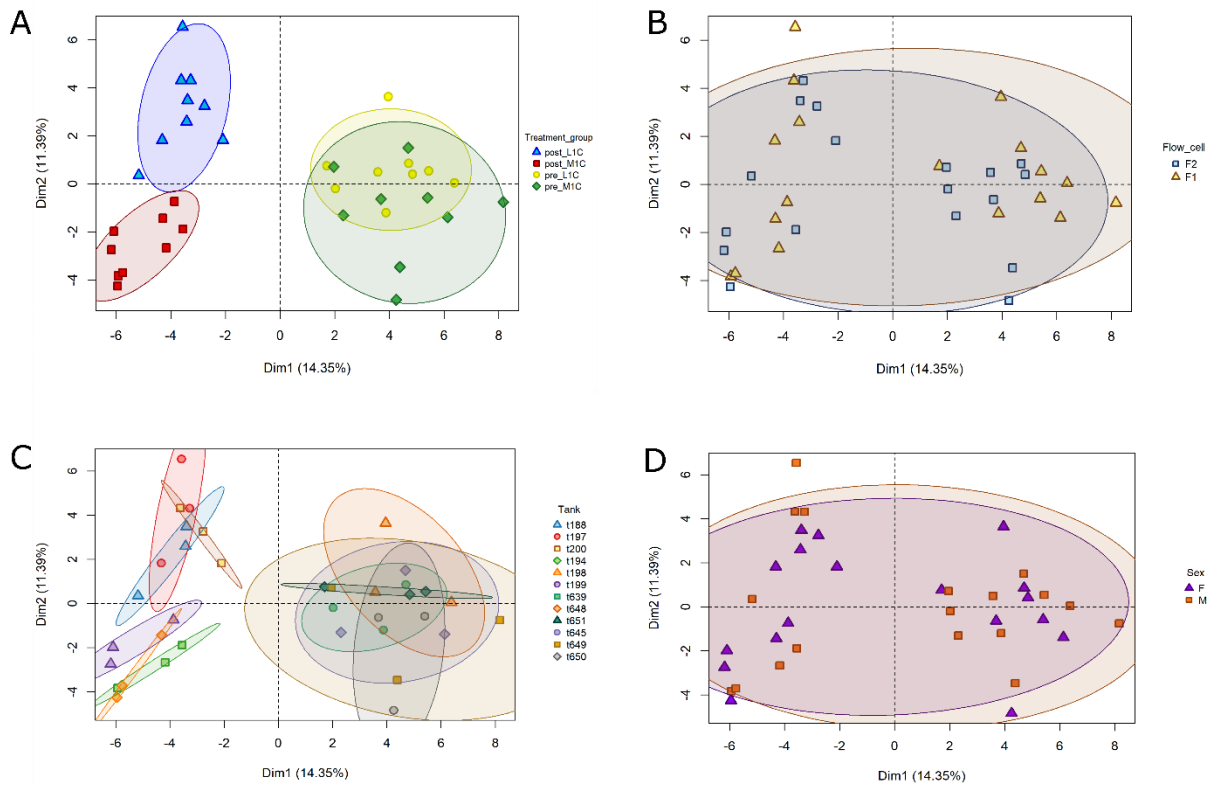

**Figure S2. Principal component analysis (PCA) plots of variance stabilizing transformed (vst), normalized mean counts per sample.**

Samples are colored by A: age (pre: pre-smolt and post: post-smolt) and dietary groups (L1C: control group, M1C: 1C+ group), B: flow cell (F: flow cell), C: tank ID (t: tank) and D: sex (F: female and M: male). Shaded areas represent 85% confidence interval of variance per treatment group.

## Supplementary\_information

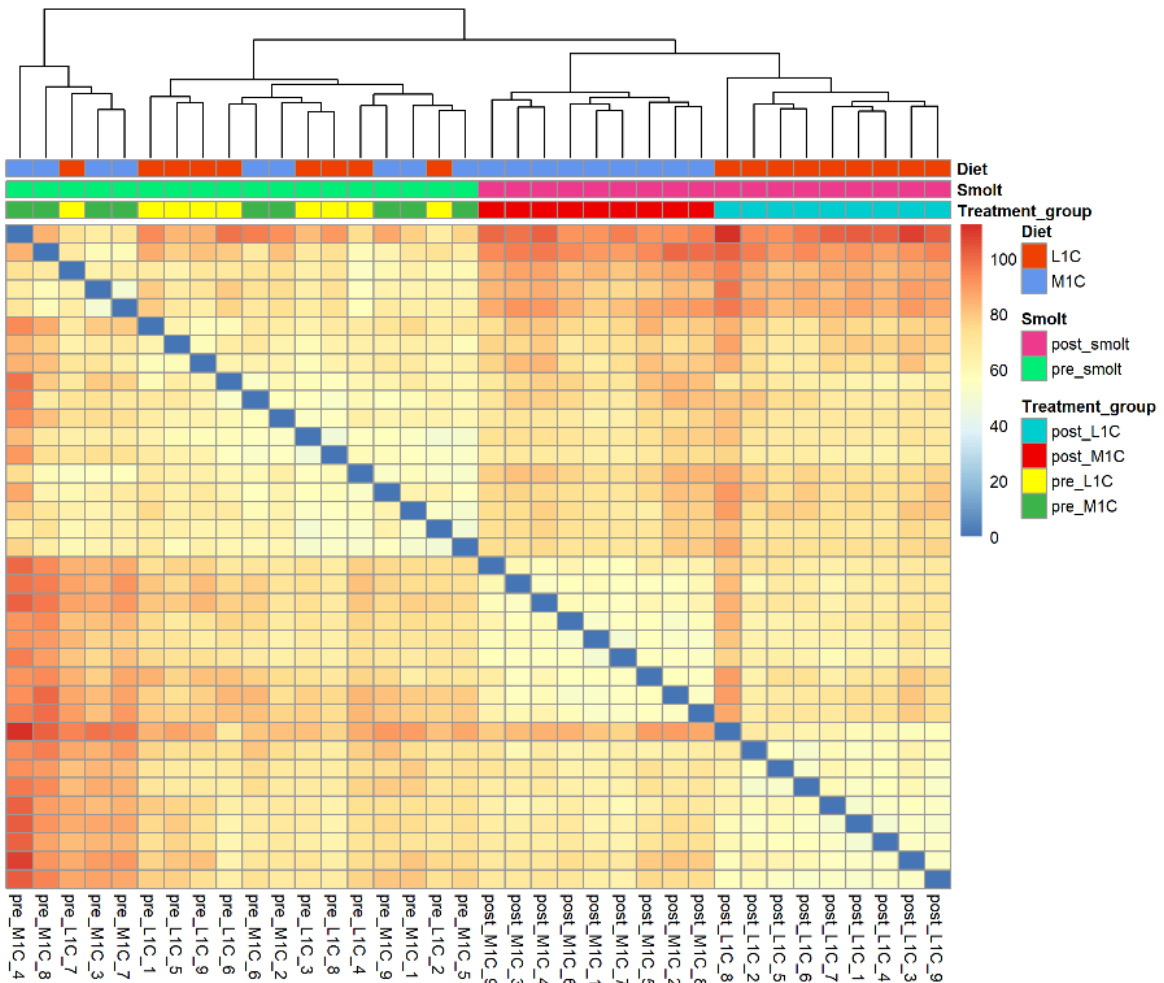

**Figure S3. Heatmap and dendrogram of variance stabilizing transformed (vst), normalized mean counts per mRNA library sample.**

Dendrograms show the hierarchical clustering of the samples, based on pairwise Euclidean distance. Heatmaps show, using a color gradient, pairwise Euclidean distance between individual samples. Pre: pre-smolt, post: post-smolt, L1C: control group, M1C: 1C+ group.

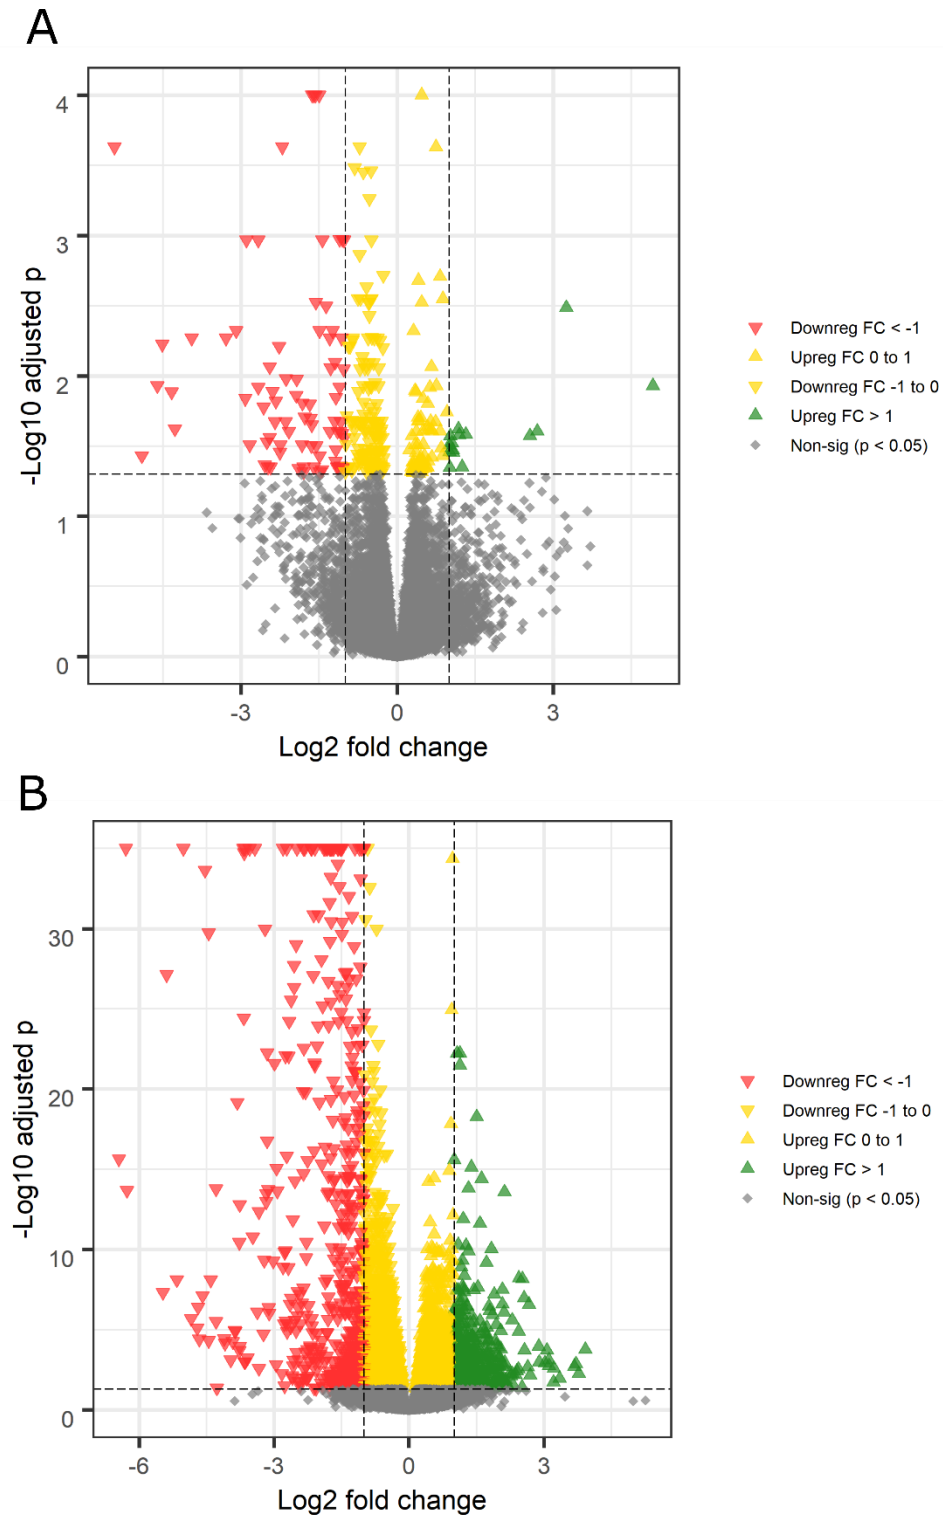

Figure S4. Volcano plot of differences in 1C+ vs. Control gene expression profiles for pre-smolt (A) and post-smolt (B) muscle.

5 DEGs ( $p < 1e-04$ ) for pre-smolt and 35 DEGs ( $p < 1e-35$ ) for post-smolt muscle are clustered at the top of the plot for plotting clarity. FC: log<sub>2</sub>-fold change.



## Supplementary\_information

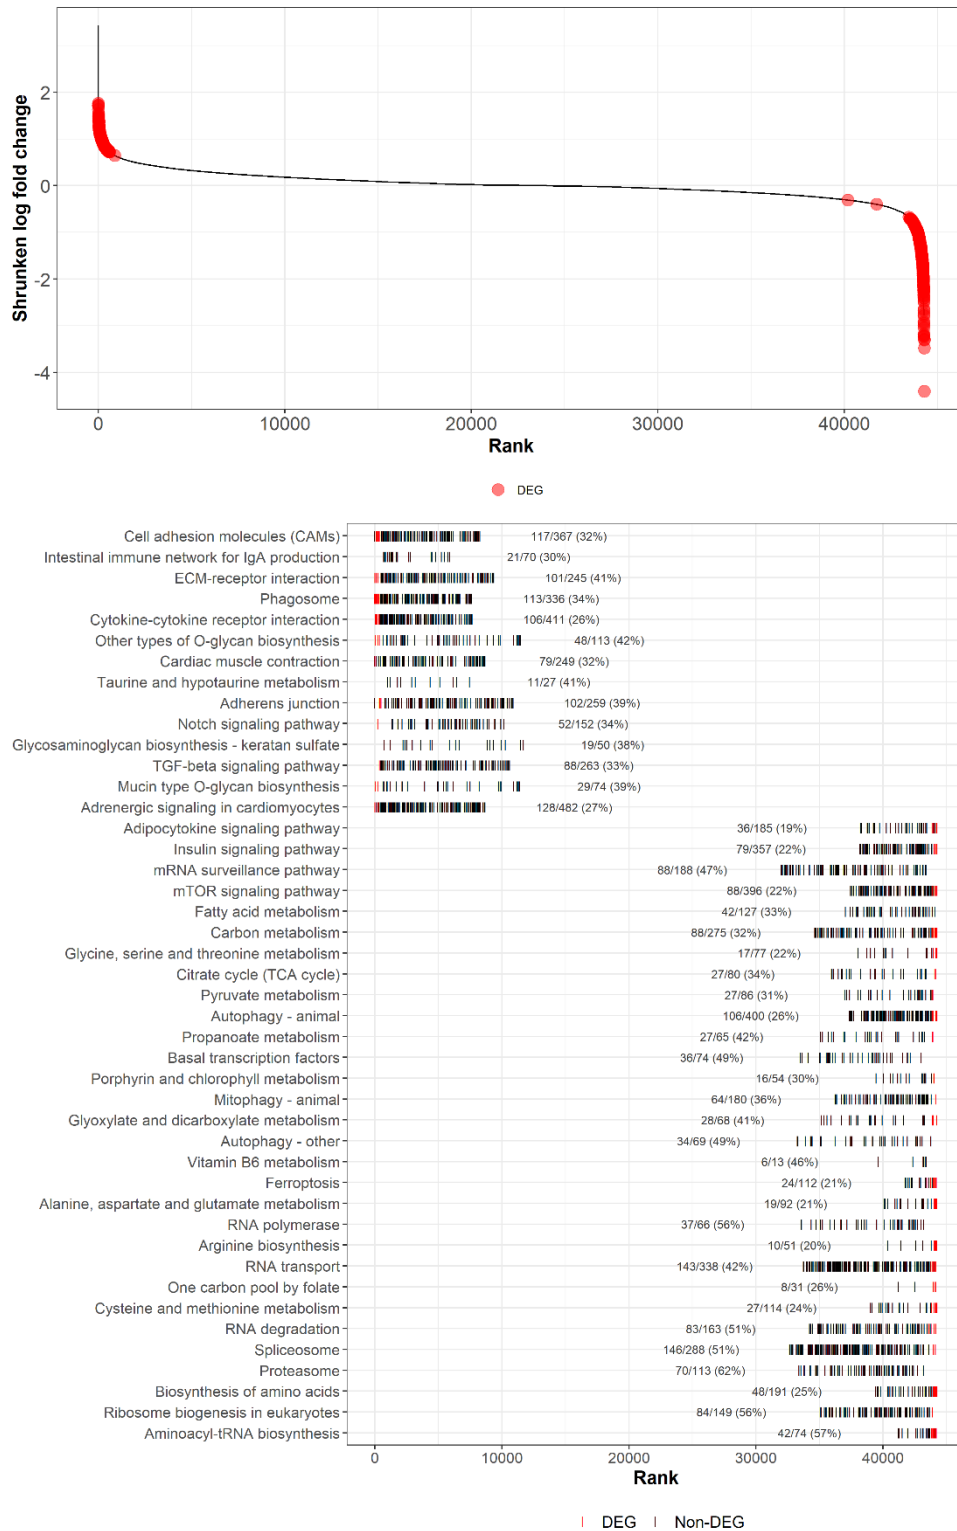

Figure S5. Gene Set Enrichment Analysis (GSEA) of KEGG pathways between 1C+ and Control post-smolt salmon muscle. GSEA is based on fold change differences for all differentially expressed genes between the 1C+ and the Control group.
